# Supplementary material for: Three-Dimensional Quantitative Measurement of Buccal Augmented Tissue After MCAT Technique With SCTG: Preliminary Results of a Prospective Case Series
Source: Research Square preprint supplement (doi:10.21203/rs.3.rs-136367/v1), 2021-01-04
Supplement: Supplementary file 1 [file 5966053a843281ed696a4292.docx]

**Three-dimensional Quantitative Measurement of Buccal Augmented Tissue after MCAT Technique with SCTG: Preliminary Results of a Prospective Case Series**

Xue Fei1,2*, Zhang Rui3, Cai Yu2,4, Zhang Yong1,2, Kang Ni2,4, Luan Qingxian4

Supplementary Table 1. ROI volumetric dynamic alteration within 1-year after the MCAT with SCTG surgery

|  | 2w | 6w | 3m | 1y |
| --- | --- | --- | --- | --- |
| Height Gain (HG)(mm) | 2.672±0.650 | 2.531±0.793 | 2.411±0.736* | 2.211±0.717*** ## |
| Area Gain (AG)(mm2) | 9.823±3.172 | 8.684±2.871* | 8.711± 2.856** | 7.614±2.511*** # |
| Volume Gain (VG)(mm3) | 11.466±5.895 | 9.101±6.263 | 8.718±5.197*** | 7.690±4.335*** # |
| Mean Thickness Gain (MTG)(mm) | 1.131±0.363 | 0.979±0.378 | 0.936±0.303** | 0.965±0.372* |

* *p* < 0.05, ** *p* < 0.01, *** *p* < 0.001 indicate statistically significant compared to 2w;

# *p* < 0.05, ## *p* < 0.01 indicate statistically significant compared to 6w.
